# Supplementary material for: Kids These Days! A Cross-Temporal Meta-Analysis of Changes in Emotional and Behavioral Problems of Population-Based Samples Over the Past Decades
Source: Research Square preprint supplement (doi:10.21203/rs.3.rs-7905820/v1), 2025-12-11
Supplement: Supplementary file 1 [file f543e4a7aac697526221bc52.docx]

**Table S1**
*Deviations From the Original Pre-Pegistration Protocol*

| Deviations from the pre-registration | | | Explanation | |
| --- | --- | --- | --- | --- |
| in conceptions | excluding datapoints from the COVID-19 pandemic | there were only a couple of studies with COVID-19 related datapoints | |
| in the search string | terms related to specific emotional and behavoral problems and age were removed from the search string, instead „population-based”, „representative” terms, and commonly used other names of the CBCL battery („Teacher Reported Form”, „Youth Self-Report” were added | the records identified with the new, more specific search string were more relevant to our inclusion criteria | |
| in the searched databases | ProQuest and ScienceDirect databases were not involved in the systematic search | gray literature (such as thesis, dissertations) and books, were identified as rather not relevant to our inlcusion criteria | |
| in the inclusion criteria | the age limit of the participants were extended to 18 years (from 14 years) | as there was a substantial number of studies reporting on adolescence, we decided to explore the changes in behavior problems in the full range of adolescence | |
| in the risk of bias assessment | we have decided to not involve a risk of bias assessment in the study | the inclusion criteria was specified for only population-based samples which limited the risk of bias related to the sampling; risk of bias is a more commonly used approach in meta-analysis of randomized controlled trials | |
| in the statistical software | instead of using the CMA (Comprehensive Meta-Analysis) we used R packages for the meta-analysis | we found more opportunities for fine-grained analysis in R | |

**Table S2***Sensitivity Analysis with Five Age Group Categories*

| Informant | Problem | Age group | *k* | beta coeff. | *p*-value | R-square |
| --- | --- | --- | --- | --- | --- | --- |
| parent | aggression | middle school-aged | 19 | -0,23 | 0,087 | 11,45802999 |
| parent | aggression | preschoolers | 18 | -0,446 | 0,134 | 8,061889703 |
| parent | aggression | primary school-aged | 29 | -0,146 | 0,079 | 7,722990952 |
| parent | aggression | teens | 11 | -0,041 | 0,728 | 0 |
| parent | aggression | toddlers | 8 | 0,17 | 0,726 | 0 |
| self | aggression | middle school-aged | 8 | **-0,402** | **0,037** | 47,27025826 |
| self | aggression | teens | 20 | 0,139 | 0,393 | 0 |
| teacher | aggression | middle school-aged | 8 | **-0,27** | **0,027** | 52,00691841 |
| teacher | aggression | primary school-aged | 8 | 0,121 | 0,727 | 0 |
| parent | anxious-depressed | middle school-aged | 21 | -0,075 | 0,661 | 0 |
| parent | anxious-depressed | preschoolers | 16 | -0,105 | 0,661 | 0 |
| parent | anxious-depressed | primary school-aged | 29 | 0,002 | 0,974 | 0 |
| parent | anxious-depressed | teens | 12 | **0,179** | **0,048** | 27,41077513 |
| parent | anxious-depressed | toddlers | 6 | -0,083 | 0,891 | 0 |
| self | anxious-depressed | middle school-aged | 10 | -0,468 | 0,168 | 12,33540688 |
| self | anxious-depressed | teens | 24 | -0,224 | 0,099 | 7,622548553 |
| teacher | anxious-depressed | middle school-aged | 10 | -0,201 | 0,162 | 13,68077192 |
| teacher | anxious-depressed | primary school-aged | 8 | 0,001 | 0,998 | 0 |
| parent | attention problems | middle school-aged | 22 | 0,059 | 0,587 | 0 |
| parent | attention problems | preschoolers | 13 | 0,088 | 0,869 | 0 |
| parent | attention problems | primary school-aged | 25 | 0,094 | 0,307 | 0,2460317163 |
| parent | attention problems | teens | 12 | 0,07 | 0,522 | 0 |
| parent | attention problems | toddlers | 5 | 0,044 | 0,948 | 0 |
| self | attention problems | middle school-aged | 10 | 0,046 | 0,889 | 0 |
| self | attention problems | teens | 22 | 0,18 | 0,404 | 0 |
| teacher | attention problems | middle school-aged | 9 | 0,313 | 0,37 | 0 |
| teacher | attention problems | primary school-aged | 7 | -0,072 | 0,907 | 0 |
| parent | deviant behavior | middle school-aged | 19 | **-0,16** | **0,035** | 19,33231269 |
| parent | deviant behavior | preschoolers | 5 | -0,255 | 0,758 | 0 |
| parent | deviant behavior | primary school-aged | 24 | -0,017 | 0,627 | 0 |
| parent | deviant behavior | teens | 9 | 0,001 | 0,989 | 0 |
| self | deviant behavior | middle school-aged | 9 | -0,047 | 0,763 | 0 |
| self | deviant behavior | teens | 19 | 0,125 | 0,369 | 0 |
| teacher | deviant behavior | middle school-aged | 8 | -0,219 | 0,15 | 19,9837786 |
| teacher | deviant behavior | primary school-aged | 8 | -0,239 | 0,13 | 22,93977859 |
| parent | externalizing | middle school-aged | 24 | -0,156 | 0,120 | 7,368217717 |
| parent | externalizing | preschoolers | 28 | 0,182 | 0,226 | 1,651093741 |
| parent | externalizing | primary school-aged | 41 | **-0,203** | **<0,001** | 26,12271536 |
| parent | externalizing | teens | 16 | **-0,321** | **0,027** | 26,40887748 |
| parent | externalizing | toddlers | 15 | 0,063 | 0,774 | 0 |
| self | externalizing | middle school-aged | 15 | -0,202 | 0,104 | 12,75010998 |
| self | externalizing | teens | 23 | 0,211 | 0,155 | 4,980153489 |
| teacher | externalizing | middle school-aged | 12 | -0,352 | 0,07 | 22,15231284 |
| teacher | externalizing | primary school-aged | 10 | -0,169 | 0,344 | 0,1019257388 |
| parent | internalizing | middle school-aged | 24 | 0,024 | 0,809 | 0 |
| parent | internalizing | preschoolers | 26 | -0,016 | 0,888 | 0 |
| parent | internalizing | primary school-aged | 41 | **-0,119** | **0,015** | 12,4295381 |
| parent | internalizing | teens | 17 | -0,203 | 0,081 | 13,493337 |
| parent | internalizing | toddlers | 12 | -0,188 | 0,326 | 0,5242903457 |
| self | internalizing | middle school-aged | 14 | -0,038 | 0,698 | 0 |
| self | internalizing | teens | 23 | -0,005 | 0,973 | 0 |
| teacher | internalizing | middle school-aged | 10 | -0,151 | 0,448 | 0 |
| teacher | internalizing | primary school-aged | 10 | -0,143 | 0,38 | 0 |
| parent | social problems | middle school-aged | 19 | -0,003 | 0,981 | 0 |
| parent | social problems | primary school-aged | 25 | -0,041 | 0,583 | 0 |
| parent | social problems | teens | 10 | 0,095 | 0,517 | 0 |
| self | social problems | middle school-aged | 9 | 0,108 | 0,593 | 0 |
| self | social problems | teens | 19 | **0,479** | **0,013** | 27,37731683 |
| teacher | social problems | middle school-aged | 8 | 0,213 | 0,457 | 0 |
| teacher | social problems | primary school-aged | 7 | 0,13 | 0,588 | 0 |
| parent | somatic complaints | middle school-aged | 19 | -0,038 | 0,752 | 0 |
| parent | somatic complaints | preschoolers | 14 | -0,261 | 0,063 | 19,7467631 |
| parent | somatic complaints | primary school-aged | 25 | -0,009 | 0,828 | 0 |
| parent | somatic complaints | teens | 11 | 0,067 | 0,56 | 0 |
| self | somatic complaints | middle school-aged | 9 | 0,133 | 0,441 | 0 |
| self | somatic complaints | teens | 20 | 0,174 | 0,144 | 7,052536698 |
| teacher | somatic complaints | middle school-aged | 9 | -0,032 | 0,729 | 0 |
| teacher | somatic complaints | primary school-aged | 7 | 0,001 | 0,991 | 0 |
| parent | thought problems | middle school-aged | 18 | 0,074 | 0,076 | 13,5164973 |
| parent | thought problems | primary school-aged | 19 | 0,088 | 0,073 | 13,08412925 |
| parent | thought problems | teens | 10 | 0,139 | 0,053 | 30,77552715 |
| self | thought problems | middle school-aged | 7 | -0,146 | 0,555 | 0 |
| self | thought problems | teens | 19 | **0,736** | **0,009** | 30,13902002 |
| teacher | thought problems | middle school-aged | 8 | -0,103 | 0,06 | 47,29883161 |
| teacher | thought problems | primary school-aged | 7 | 0,04 | 0,759 | 0 |
| parent | total problems | middle school-aged | 21 | 0,031 | 0,664 | 0 |
| parent | total problems | preschoolers | 18 | 0,079 | 0,545 | 0 |
| parent | total problems | primary school-aged | 35 | 0,007 | 0,871 | 0 |
| parent | total problems | teens | 13 | -0,005 | 0,956 | 0 |
| parent | total problems | toddlers | 5 | -0,41 | 0,116 | 49,5462838 |
| self | total problems | middle school-aged | 10 | 0,144 | 0,3 | 2,192396636 |
| self | total problems | teens | 19 | 0,253 | 0,069 | 13,28949409 |
| teacher | total problems | middle school-aged | 11 | -0,103 | 0,439 | 0 |
| teacher | total problems | preschoolers | 5 | 0,045 | 0,61 | 0 |
| teacher | total problems | primary school-aged | 10 | -0,041 | 0,658 | 0 |
| parent | withdrawn-depressed | middle school-aged | 20 | -0,066 | 0,537 | 0 |
| parent | withdrawn-depressed | preschoolers | 12 | -0,045 | 0,81 | 0 |
| parent | withdrawn-depressed | primary school-aged | 24 | -0,12 | 0,073 | 10,18275766 |
| parent | withdrawn-depressed | teens | 12 | 0,009 | 0,95 | 0 |
| parent | withdrawn-depressed | toddlers | 5 | 0,377 | 0,454 | 0 |
| self | withdrawn-depressed | middle school-aged | 10 | 0,049 | 0,604 | 0 |
| self | withdrawn-depressed | teens | 20 | 0,167 | 0,378 | 0 |
| teacher | withdrawn-depressed | middle school-aged | 9 | -0,164 | 0,294 | 3,794817282 |
| teacher | withdrawn-depressed | primary school-aged | 7 | -0,294 | 0,337 | 1,995850891 |

Note: heterogeneity *I*2 was above 91% in all analysis

**Table S3**

*Supplementary Analysis of the Mean Differences Between the 1991 Versions and 2001 Versions of the CBCL, TRF, and YSR*

| **informant** | **problem** | **version** | **N** | ***k*** | **Mean** | **95%CI** | | ***p*-value** |
| --- | --- | --- | --- | --- | --- | --- | --- | --- |
| parent | aggression | 1991 | 16252 | 9 | 17,6956641 | 12,316835 | 23,0744932 | 0,786 |
| parent | aggression | 2001 | 54806 | 17 | 16,9178263 | 13,3465239 | 20,4891286 |
| self | aggression | 1991 | 23720 | 6 | 25,4520184 | 22,6781261 | 28,2259107 | 0,285 |
| self | aggression | 2001 | 26887 | 6 | 23,050203 | 17,9823062 | 28,1180998 |
| teacher | aggression | 1991 | 2168 | 2 | 8,75820161 | -19,2645991 | 36,7810023 | 0,237 |
| teacher | aggression | 2001 | 7851 | 6 | 13,1797995 | 5,41461668 | 20,9449822 |
| parent | anxious-depressed | 1991 | 15901 | 9 | 12,7322502 | 7,76533465 | 17,6991658 | 0,554 |
| parent | anxious-depressed | 2001 | 52873 | 16 | 14,2465654 | 11,2949095 | 17,1982212 |
| self | anxious-depressed | 1991 | 23720 | 6 | 23,8331785 | 19,9843434 | 27,6820136 | 0,0511 |
| self | anxious-depressed | 2001 | 14490 | 7 | 17,8932788 | 11,4071662 | 24,3793914 |
| teacher | anxious-depressed | 1991 | 2168 | 2 | 12,0398875 | -23,4123809 | 47,492156 | 0,733 |
| teacher | anxious-depressed | 2001 | 9100 | 6 | 10,9383547 | 6,70322274 | 15,1734866 |
| parent | attention problems | 1991 | 14789 | 7 | 14,9915943 | 9,99310207 | 19,9900865 | 0,0526 |
| parent | attention problems | 2001 | 53932 | 17 | 20,0124058 | 16,6353725 | 23,389439 |
| self | attention problems | 1991 | 23720 | 6 | 33,9789857 | 22,1891883 | 45,7687832 | 0,132 |
| self | attention problems | 2001 | 12923 | 6 | 25,2908695 | 16,2601088 | 34,3216302 |
| teacher | attention problems | 1991 | 2168 | 2 | 16,1521653 | -5,07906482 | 37,3833954 | 0,5499 |
| teacher | attention problems | 2001 | 7851 | 6 | 19,2748211 | 6,55478157 | 31,9948607 |
| parent | deviant behavior | 1991 | 16252 | 9 | 7,55388866 | 2,92510523 | 12,1826721 | 0,1982 |
| parent | deviant behavior | 2001 | 9447 | 7 | 4,85599552 | 3,36373282 | 6,34825823 |
| self | deviant behavior | 1991 | 23720 | 6 | 14,8466152 | 9,62010019 | 20,0731302 | 0,222 |
| self | deviant behavior | 2001 | 26887 | 6 | 11,6455796 | 7,37558473 | 15,9155744 |
| teacher | deviant behavior | 1991 | 2168 | 2 | 7,41783946 | -29,7643552 | 44,6000341 | 0,341 |
| teacher | deviant behavior | 2001 | 9618 | 5 | 4,48626181 | 1,80269291 | 7,1698307 |
| parent | externalizing | 1991 | 29773 | 13 | 13,0333478 | 9,8174922 | 16,2492034 | 0,646 |
| parent | externalizing | 2001 | 123911 | 28 | 13,9804117 | 11,0146523 | 16,9461711 |
| self | externalizing | 1991 | 32865 | 9 | 20,506719 | 17,5107147 | 23,5027232 | **0,042** |
| self | externalizing | 2001 | 15344 | 8 | 16,6193045 | 13,2904531 | 19,9481559 |
| teacher | externalizing | 1991 | 1962 | 2 | 10,4366442 | -47,2233407 | 68,096629 | 0,577 |
| teacher | externalizing | 2001 | 9731 | 9 | 7,8275524 | 5,10790791 | 10,5471969 |
| parent | internalizing | 1991 | 28991 | 12 | 10,9909514 | 8,7414685 | 13,2404344 | 0,249 |
| parent | internalizing | 2001 | 122662 | 28 | 9,5568577 | 8,09758786 | 11,0161276 |
| self | internalizing | 1991 | 32865 | 9 | 21,0353902 | 18,024054 | 24,0467264 | **0,008** |
| self | internalizing | 2001 | 14664 | 7 | 16,5521426 | 13,9064094 | 19,1978759 |
| teacher | internalizing | 1991 | 1962 | 2 | 7,99315973 | 2,68265904 | 13,3036604 | 0,427 |
| teacher | internalizing | 2001 | 9731 | 9 | 7,04077322 | 4,4476969 | 9,63384954 |
| parent | social problems | 1991 | 14789 | 7 | 9,62035318 | 6,44141359 | 12,7992928 | 0,990 |
| parent | social problems | 2001 | 8544 | 8 | 9,59520821 | 5,94859583 | 13,2418206 |
| self | social problems | 1991 | 23720 | 6 | 10,8218272 | 8,64455996 | 12,9990943 | 0,055 |
| self | social problems | 2001 | 11211 | 5 | 14,3708272 | 9,79819933 | 18,943455 |
| teacher | social problems | 1991 | 2168 | 2 | 7,30443072 | -10,2187541 | 24,8276156 | 0,880 |
| teacher | social problems | 2001 | 6862 | 4 | 7,72485482 | 0,01385366 | 15,435856 |
| parent | somatic complaints | 1991 | 15470 | 8 | 8,87452467 | 6,25129421 | 11,4977551 | 0,661 |
| parent | somatic complaints | 2001 | 51385 | 14 | 8,26362515 | 6,43836513 | 10,0888852 |
| self | somatic complaints | 1991 | 23720 | 6 | 15,5068268 | 14,1684984 | 16,8451552 | 0,141 |
| self | somatic complaints | 2001 | 26887 | 6 | 13,1241363 | 9,18041562 | 17,067857 |
| teacher | somatic complaints | 1991 | 2168 | 2 | 5,6808306 | -39,9955106 | 51,3571719 | 0,470 |
| teacher | somatic complaints | 2001 | 7738 | 5 | 3,05635498 | 1,57296524 | 4,53974471 |
| parent | thought problems | 1991 | 14789 | 7 | 3,7151789 | 2,24191531 | 5,18844249 | 0,433 |
| parent | thought problems | 2001 | 7809 | 6 | 4,59031374 | 2,17051462 | 7,01011285 |
| self | thought problems | 1991 | 23720 | 6 | 7,10915152 | 4,43566357 | 9,78263947 | **0,002** |
| self | thought problems | 2001 | 11211 | 5 | 13,6349291 | 8,49780476 | 18,7720534 |
| teacher | thought problems | 1991 | 2168 | 2 | 1,47491204 | -6,86604842 | 9,8158725 | 0,412 |
| teacher | thought problems | 2001 | 6862 | 4 | 2,52287011 | -0,97311063 | 6,01885086 |
| parent | total problems | 1991 | 28936 | 11 | 10,5323552 | 8,66519968 | 12,3995107 | 0,972 |
| parent | total problems | 2001 | 20245 | 14 | 10,5827534 | 8,00154174 | 13,163965 |
| self | total problems | 1991 | 33518 | 9 | 17,7825077 | 15,6465029 | 19,9185124 | 0,466 |
| self | total problems | 2001 | 17142 | 6 | 16,6697211 | 13,5477959 | 19,7916462 |
| parent | withdrawn-depressed | 1991 | 15470 | 8 | 9,87125558 | 7,20016601 | 12,5423451 | 0,815 |
| parent | withdrawn-depressed | 2001 | 19647 | 13 | 10,248539 | 7,73109141 | 12,7659867 |
| self | withdrawn-depressed | 1991 | 23720 | 6 | 23,0610178 | 20,7054562 | 25,4165795 | 0,212 |
| self | withdrawn-depressed | 2001 | 26887 | 6 | 21,4382263 | 19,0698208 | 23,8066317 |
| teacher | withdrawn-depressed | 1991 | 2168 | 2 | 14,0755886 | -27,6386382 | 55,7898155 | 0,272 |
| teacher | withdrawn-depressed | 2001 | 7738 | 5 | 10,0970863 | 5,86362349 | 14,3305491 |

**Table S4**

*Year of Data Colletion Points by Country*

| *Country* | Sum | 1981-1990 | 1991-2000 | 2001-2010 | 2011-2019 |
| --- | --- | --- | --- | --- | --- |
| Australia | 7 | 1 | 3 | 3 | 0 |
| Belgium | 3 | 0 | 1 | 2 | 0 |
| Brazil | 2 | 0 | 0 | 0 | 2 |
| Canada | 7 | 1 | 2 | 0 | 4 |
| Chile | 2 | 0 | 0 | 0 | 2 |
| China | 12 | 1 | 3 | 4 | 4 |
| Croatia | 3 | 0 | 0 | 2 | 1 |
| Denmark | 7 | 0 | 2 | 3 | 2 |
| Finland | 6 | 1 | 2 | 3 | 0 |
| France | 2 | 1 | 0 | 0 | 1 |
| Germany | 6 | 0 | 0 | 4 | 2 |
| Greece | 6 | 0 | 3 | 3 | 0 |
| Hungary | 1 | 0 | 1 | 0 | 0 |
| Iceland | 1 | 0 | 1 | 0 | 0 |
| India | 1 | 0 | 0 | 0 | 1 |
| Iran | 1 | 0 | 0 | 1 | 0 |
| Iraqui Kurdistan | 1 | 0 | 1 | 0 | 0 |
| Ireland | 1 | 0 | 1 | 0 | 0 |
| Italy | 6 | 0 | 0 | 1 | 5 |
| Jamaica | 1 | 0 | 1 | 0 | 0 |
| Japan | 1 | 0 | 0 | 0 | 1 |
| Kenyan | 1 | 0 | 0 | 1 | 0 |
| Kosovo | 1 | 0 | 0 | 0 | 1 |
| Lithuania | 1 | 0 | 0 | 1 | 0 |
| Netherlands | 24 | 2 | 3 | 15 | 4 |
| Norway | 8 | 0 | 2 | 5 | 1 |
| Portugal | 3 | 0 | 0 | 2 | 1 |
| Russia | 2 | 0 | 1 | 1 | 0 |
| Singapore | 1 | 0 | 0 | 1 | 0 |
| South African Republic | 1 | 0 | 0 | 0 | 1 |
| South Brazil | 1 | 0 | 0 | 1 | 0 |
| South Korea | 1 | 0 | 0 | 1 | 0 |
| Spain | 2 | 0 | 0 | 1 | 1 |
| Sweden | 4 | 0 | 2 | 1 | 1 |
| Switzerland | 3 | 0 | 3 | 0 | 0 |
| Taiwan | 1 | 0 | 0 | 1 | 0 |
| Thailand | 1 | 0 | 1 | 0 | 0 |
| Turkey | 3 | 0 | 3 | 0 | 0 |
| U.K. | 1 | 0 | 0 | 0 | 1 |
| UK | 4 | 0 | 0 | 1 | 3 |
| United Arab Emirates | 1 | 0 | 0 | 1 | 0 |
| Uruguay | 2 | 0 | 0 | 1 | 1 |
| USA | 30 | 4 | 11 | 10 | 3 |
| Vietnam | 2 | 0 | 1 | 0 | 1 |

**Table S5**

*Sensitivity Analysis Without Influential Studies (Three Age Groups)*

|  |  |  |  |  |  |  |  |  |  |  |  |  | With all studies | | Without influential study | |
| --- | --- | --- | --- | --- | --- | --- | --- | --- | --- | --- | --- | --- | --- | --- | --- | --- |
| rstudent | dffits | cook.d | cov.r | tau2.del | QE.del | hat | weight | dfbetayear | influential study | informant | problem | age category | *p* | *b* coeff. | *b* coeff. | *p* |
| 1,47 | 1,01 | 0,96 | 1,32 | 66,06 | 20573 | 0,32 | 4,18 | -0,937 | Uljas_1999 | parent | aggression | early childhood | 0,251 | -0,273 | -0,061 | 0,821 |
| 2,57 | 0,76 | 0,52 | 0,86 | 17,69 | 5407 | 0,08 | 2,14 | 0,650 | Gori_2021 | parent | aggression | middle childhood | **0,009** | **-0,18** | **-0,221** | **0,001** |
| 2,84 | 1,61 | 1,83 | 0,66 | 26,70 | 3100 | 0,24 | 5,28 | 1,424 | Cerniglia_2023 | self | aggression | teens | 0,191 | 0,255 | 0,251 | 0,115 |
| -3,65 | -1,66 | 1,60 | 0,41 | 21,91 | 3217 | 0,17 | 5,27 | -1,382 | Zubeidat_2018 | self | aggression | teens | 0,191 | 0,255 | 0,251 | 0,115 |
| 0,76 | 0,56 | 0,33 | 1,62 | 60,68 | 10654 | 0,35 | 5,01 | -0,522 | Uljas_1999 | parent | anxious-depressed | early childhood | 0,791 | -0,062 | 0,06 | 0,835 |
| 0,07 | 0,02 | 0,00 | 1,19 | 24,96 | 7999 | 0,12 | 2,04 | -0,023 | Achenbach_1983 | parent | anxious-depressed | middle childhood | 0,777 | -0,021 | 0,004 | 0,949 |
| 5,55 | 0,87 | 0,47 | 0,38 | 14,89 | 7537 | 0,02 | 1,97 | -0,323 | Ahmad_2007 | parent | anxious-depressed | middle childhood | 0,777 | -0,021 | 0,004 | 0,949 |
| 3,54 | 1,81 | 1,50 | 0,23 | 32,51 | 7109 | 0,21 | 8,61 | -1,435 | Glover_1999 | self | anxious-depressed | middle childhood | 0,168 | -0,377 | -0,141 | 0,447 |
| 2,19 | 1,44 | 1,66 | 0,87 | 44,51 | 965 | 0,30 | 5,71 | 1,304 | Riva_2023 | teacher | attention problems | middle childhood | 0,739 | 0,085 | -0,205 | 0,44 |
| -2,18 | -1,21 | 1,22 | 0,91 | 60,68 | 17511 | 0,24 | 4,78 | -1,083 | Cerniglia_2023 | self | attention problems | teens | 0,36 | 0,236 | 0,486 | 0,075 |
| 1,27 | 0,63 | 0,39 | 1,21 | 37,94 | 70221 | 0,20 | 2,34 | -0,588 | Hensley_1988 | parent | externalizing | early childhood | 0,192 | 0,155 | 0,223 | 0,089 |
| 0,11 | 0,04 | 0,00 | 1,15 | 13,41 | 6489 | 0,10 | 1,60 | -0,032 | Achenbach_1983 | parent | externalizing | middle childhood | **<0.001** | **-0,251** | **-0,192** | **<0.001** |
| 2,41 | 0,71 | 0,47 | 0,93 | 12,16 | 5925 | 0,08 | 1,63 | 0,633 | Gori_2021 | parent | externalizing | middle childhood | **<0.001** | **-0,205** | **-0,192** | **<0.001** |
| 2,57 | 0,75 | 0,51 | 0,90 | 12,00 | 6088 | 0,08 | 1,60 | -0,667 | Hensley_1988 | parent | externalizing | middle childhood | **<0.001** | **-0,205** | **-0,192** | **<0.001** |
| 1,39 | 1,09 | 1,11 | 1,41 | 11,96 | 929 | 0,38 | 6,17 | -0,997 | Hensley_1988 | parent | externalizing | teens | **0,045** | **-0,291** | -0,163 | 0,318 |
| 2,91 | 1,18 | 1,03 | 0,62 | 16,83 | 6525 | 0,14 | 4,48 | 0,984 | Bhola_2017 | self | externalizing | teens | 0,111 | 0,239 | 0,119 | 0,37 |
| 3,41 | 1,76 | 2,42 | 0,75 | 19,31 | 46271 | 0,21 | 2,56 | -1,657 | Hensley_1988 | parent | internalizing | early childhood | 0,496 | -0,068 | 0,075 | 0,437 |
| -1,31 | -2,59 | 5,40 | 3,17 | 11,63 | 285 | 0,80 | 19,95 | 2,241 | Kerr_2007 | teacher | internalizing | early childhood | 0,983 | -0,006 | -0,512 | 0,37 |
| 0,05 | 0,02 | 0,00 | 1,15 | 10,74 | 8479 | 0,10 | 1,58 | -0,014 | Achenbach_1983 | parent | internalizing | middle childhood | **0,033** | **-0,10** | -0,055 | 0,217 |
| 2,51 | 0,72 | 0,48 | 0,92 | 9,70 | 8100 | 0,08 | 1,57 | -0,641 | Hensley_1988 | parent | internalizing | middle childhood | **0,033** | **-0,10** | -0,055 | 0,217 |
| 3,33 | 2,56 | 3,96 | 0,57 | 5,52 | 1131 | 0,37 | 5,77 | -2,362 | Hensley_1988 | parent | internalizing | teens | 0,115 | -0,187 | 0,017 | 0,874 |
| 2,57 | 1,06 | 0,88 | 0,71 | 19,71 | 6847 | 0,14 | 4,52 | 0,879 | Bhola_2017 | self | internalizing | teens | 0,879 | 0,023 | -0,093 | 0,513 |
| 3,09 | 2,67 | 1,87 | 0,12 | 23,77 | 379 | 0,43 | 19,97 | 1,955 | Yunis_2007 | parent | deviant behavior | early childhood | 0,758 | -0,255 | -1,006 | 0,157 |
| -2,19 | -0,90 | 0,73 | 0,97 | 5,22 | 3423 | 0,15 | 2,46 | 0,822 | Achenbach_1983 | parent | deviant behavior | middle childhood | 0,07 | -0,077 | **-0,109** | **0,013** |
| 2,47 | 1,20 | 1,05 | 0,63 | 6,11 | 533 | 0,19 | 6,39 | -0,980 | Weine_1995_China | teacher | deviant behavior | middle childhood | **0,035** | **-0,22** | -0,142 | 0,121 |
| -1,54 | -1,49 | 1,88 | 1,41 | 0,77 | 82 | 0,48 | 10,45 | 1,319 | Bongers 2003 | parent | deviant behavior | teens | 0,937 | -0,005 | -0,084 | 0,321 |
| 4,92 | 3,44 | 4,21 | 0,17 | 10,85 | 587 | 0,33 | 7,16 | 3,130 | Riva_2023 | teacher | social problems | middle childhood | 0,26 | 0,22 | -0,118 | 0,369 |
| 1,41 | 1,43 | 1,84 | 1,65 | 6,03 | 287 | 0,51 | 8,95 | 1,295 | Shanini_2014 | parent | social problems | teens | 0,448 | 0,101 | -0,055 | 0,744 |
| 3,54 | 2,00 | 2,37 | 0,47 | 18,95 | 2686 | 0,24 | 5,25 | 1,761 | Cerniglia_2023 | self | social problems | teens | **0,013** | **0,479** | **0,416** | **0,001** |
| 3,57 | 1,53 | 1,39 | 0,41 | 18,98 | 3960 | 0,16 | 5,19 | -1,252 | Lambert_1999 | self | social problems | teens | **0,013** | **0,479** | **0,416** | **0,001** |
| 2,23 | 1,68 | 2,24 | 0,98 | 12,87 | 4401 | 0,36 | 5,88 | -1,538 | Uljas_1999 | parent | somatic complaints | early childhood | 0,361 | -0,119 | 0,054 | 0,699 |
| 0,01 | 0,00 | 0,00 | 1,23 | 10,55 | 6026 | 0,15 | 2,37 | -0,004 | Achenbach_1983 | parent | somatic complaints | middle childhood | 0,799 | -0,013 | 0,01 | 0,806 |
| 6,39 | 1,13 | 0,64 | 0,26 | 5,12 | 4233 | 0,03 | 2,37 | -0,491 | Hellinckx_2000 | parent | somatic complaints | middle childhood | 0,799 | -0,013 | 0,01 | 0,806 |
| -2,07 | -1,33 | 1,21 | 0,66 | 10,89 | 2194 | 0,29 | 11,17 | -1,050 | Chang_2019 | self | somatic complaints | middle childhood | 0,441 | 0,133 | 0,273 | 0,119 |
| 5,84 | 1,96 | 1,16 | 0,07 | 0,89 | 144 | 0,09 | 6,23 | 1,136 | Grigorenko_2010 | teacher | somatic complaints | middle childhood | 0,785 | -0,017 | -0,053 | 0,121 |
| 6,64 | 3,58 | 3,67 | 0,11 | 3,98 | 511 | 0,22 | 5,07 | 3,046 | Cerniglia_2023 | self | somatic complaints | teens | 0,144 | 0,174 | -0,015 | 0,831 |
| 2,81 | 1,73 | 1,27 | 0,24 | 11,74 | 864 | 0,28 | 14,22 | -1,205 | Obot_2004 | self | thought problems | middle childhood | 0,555 | -0,146 | 0,034 | 0,843 |
| 3,45 | 1,29 | 0,88 | 0,28 | 1,11 | 301 | 0,12 | 6,95 | 0,766 | Tehrani-Doost_2011 | teacher | thought problems | middle childhood | 0,227 | -0,068 | **-0,097** | **0,029** |
| 1,60 | 1,59 | 2,19 | 1,45 | 1,16 | 326 | 0,50 | 8,81 | 1,451 | Shanini_2014 | parent | thought problems | teens | 0,057 | 0,125 | 0,048 | 0,519 |
| 2,05 | 1,16 | 1,14 | 0,93 | 56,26 | 4603 | 0,24 | 5,26 | 1,028 | Cerniglia_2023 | self | thought problems | teens | **0,009** | **0,736** | 0,049 | 0,797 |
| 2,50 | 1,31 | 1,31 | 0,74 | 51,23 | 6352 | 0,22 | 5,23 | 1,140 | Lisi_2020 | self | thought problems | teens | **0,009** | **0,736** | 0,049 | 0,797 |
| 0,60 | 0,42 | 0,18 | 1,56 | 21,22 | 7997 | 0,32 | 4,32 | -0,386 | Hensley_1988 | parent | total problems | early childhood | 0,767 | -0,034 | 0,01 | 0,94 |
| 6,20 | 2,79 | 0,76 | 0,01 | 0,19 | 11 | 0,17 | 16,74 | 0,556 | Liu_2011 | teacher | total problems | early childhood | 0,796 | 0,019 | -0,082 | 0,135 |
| -1,28 | -3,55 | 11,00 | 6,53 | 2,44 | 92 | 0,89 | 15,82 | 3,227 | Verhulst_1986 | teacher | total problems | early childhood | 0,796 | 0,019 | -0,082 | 0,135 |
| 2,42 | 1,79 | 2,29 | 0,79 | 3,11 | 658 | 0,35 | 7,12 | -1,598 | Hensley_1988 | parent | total problems | teens | 0,985 | 0,002 | 0,11 | 0,204 |
| 2,80 | 1,69 | 2,02 | 0,67 | 10,20 | 6989 | 0,27 | 5,51 | 1,512 | Bhola_2017 | self | total problems | teens | **0,046** | **0,292** | -0,092 | 0,59 |
| 0,13 | 0,10 | 0,01 | 1,83 | 15,50 | 7259 | 0,38 | 5,56 | 0,096 | Lisi_2020 | self | total problems | teens | **0,046** | **0,292** | -0,092 | 0,59 |
| 3,95 | 3,70 | 5,24 | 0,27 | 5,78 | 607 | 0,47 | 9,06 | -3,326 | Coulombe_2010 | self | withdrawn-depressed | middle childhood | 0,139 | -0,184 | 0,049 | 0,604 |
| 4,14 | 2,28 | 2,68 | 0,34 | 21,50 | 3280 | 0,23 | 5,23 | 2,012 | Lisi_2020 | self | withdrawn-depressed | teens | 0,071 | 0,395 | 0,1 | 0,549 |

**Table S6**

*Sensitivity Analysis Without Influential Studies (Three Age Groups – Three Continents)*

|  |  |  |  |  |  |  |  |  |  |  |  |  | With all studies | | Without influential study | |
| --- | --- | --- | --- | --- | --- | --- | --- | --- | --- | --- | --- | --- | --- | --- | --- | --- |
| rstudent | dffits | cook.d | cov.r | tau2.del | QE.del | hat | weight | dfbetayear | influential study | informant | problem | age category | *p* | *b* coeff. | *b* coeff. | *p* |
| *Europe* | | | | | | | | | | | | | | | | |
| 2,18 | 1,97 | 2,89 | 1,01 | 43,95 | 4251 | 0,45 | 7,73 | -1,790 | Uljas_1999 | parent | aggression | early childhood | 0,221 | -0,357 | 0,068 | 0,829 |
| 3,19 | 1,69 | 1,81 | 0,52 | 11,96 | 2158 | 0,22 | 5,55 | 1,454 | Gori_2021 | parent | aggression | middle childhood | 0,347 | -0,113 | **-0,247** | **0,028** |
| 9,05 | 6,69 | 1,70 | 0,00 | 0,38 | 10 | 0,37 | 19,91 | -4,531 | Broberg_2001 | self | aggression | middle childhood | 0,283 | -0,3 | -0,104 | 0,164 |
| -1,36 | -1,36 | 1,59 | 1,49 | 1,76 | 59 | 0,50 | 14,82 | 1,148 | Dekker_2002 | teacher | aggression | middle childhood | 0,052 | -0,204 | **-0,289** | **0,041** |
| 3,20 | 1,89 | 2,16 | 0,49 | 24,11 | 2766 | 0,26 | 6,26 | 1,647 | Cerniglia_2023 | self | aggression | teens | 0,487 | 0,149 | 0,114 | 0,447 |
| -3,61 | -1,70 | 1,55 | 0,35 | 21,54 | 3057 | 0,18 | 6,25 | -1,375 | Zubeidat_2018 | self | aggression | teens | 0,487 | 0,149 | 0,114 | 0,447 |
| 1,90 | 1,94 | 2,74 | 1,09 | 28,00 | 1395 | 0,51 | 11,14 | -1,713 | Uljas_1999 | parent | anxious-depressed | early childhood | 0,353 | -0,246 | 0,116 | 0,698 |
| -5,26 | -2,53 | 0,82 | 0,02 | 4,08 | 58 | 0,19 | 16,76 | 0,776 | Sandoval_2006 | self | anxious-depressed | middle childhood | 0,657 | 0,14 | 0,057 | 0,639 |
| 4,96 | 3,08 | 1,94 | 0,06 | 0,95 | 55 | 0,28 | 12,56 | -2,166 | Roussos_1999 | teacher | anxious-depressed | middle childhood | 0,244 | -0,147 | -0,033 | 0,591 |
| -1,61 | -1,27 | 1,22 | 0,94 | 23,91 | 527 | 0,38 | 14,50 | 1,005 | Reijneveld_2006 | parent | attention problems | early childhood | 0,669 | 0,171 | -0,159 | 0,703 |
| -1,95 | -1,15 | 1,11 | 0,96 | 48,83 | 16598 | 0,26 | 5,90 | -1,008 | Cerniglia_2023 | self | attention problems | teens | 0,904 | -0,031 | 0,201 | 0,451 |
| 5,10 | 1,59 | 0,93 | 0,13 | 2,11 | 1018 | 0,09 | 6,06 | -0,908 | Christensen_2000 | parent | deviant behavior | middle childhood | 0,517 | -0,054 | -0,047 | 0,457 |
| 0,71 | 0,59 | 0,36 | 1,82 | 6,29 | 1305 | 0,41 | 6,27 | 0,544 | Gori_2021 | parent | deviant behavior | middle childhood | 0,517 | -0,054 | -0,047 | 0,457 |
| 2,27 | 1,42 | 1,21 | 0,50 | 0,52 | 85 | 0,28 | 12,34 | -1,049 | Roussos_1999 | teacher | deviant behavior | middle childhood | 0,15 | -0,083 | -0,042 | 0,374 |
| -2,13 | -2,86 | 4,86 | 1,01 | 0,24 | 23 | 0,64 | 14,84 | 2,538 | Bongers 2003 | parent | deviant behavior | teens | 0,881 | -0,007 | -0,047 | 0,008 |
| -3,01 | -2,08 | 1,53 | 0,25 | 0,14 | 12 | 0,30 | 15,88 | -1,365 | Rudan_2005 | parent | deviant behavior | teens | 0,881 | -0,007 | -0,047 | 0,008 |
| 2,71 | 1,34 | 1,46 | 0,82 | 11,45 | 2330 | 0,20 | 3,35 | 1,218 | Gori_2021 | parent | externalizing | middle childhood | **0,028** | **-0,201** | **-0,215** | **0,001** |
| 2,27 | 1,50 | 1,49 | 0,55 | 0,83 | 44 | 0,30 | 11,17 | 1,217 | Henriksen_2012 | teacher | externalizing | middle childhood | 0,068 | -0,145 | -0,146 | 0,078 |
| -2,28 | -1,52 | 1,37 | 0,58 | 0,80 | 32 | 0,31 | 13,59 | -1,124 | Machado_2021 | teacher | externalizing | middle childhood | 0,068 | -0,145 | -0,146 | 0,078 |
| -5,06 | -1,25 | 0,61 | 0,17 | 6,17 | 961 | 0,06 | 5,58 | -0,173 | Zandstra_2018 | self | externalizing | teens | 0,811 | 0,033 | 0,048 | 0,585 |
| 5,21 | 1,34 | 0,69 | 0,15 | 5,45 | 17660 | 0,06 | 5,54 | 0,431 | Theunissen_2017 | parent | internalizing | early childhood | 0,177 | 0,164 | 0,133 | 0,083 |
| 1,17 | 1,36 | 1,71 | 2,01 | 42,72 | 407 | 0,56 | 15,37 | -1,145 | Dekker_2002 | teacher | social problems | middle childhood | 0,174 | 0,607 | -0,353 | 0,126 |
| 12,66 | 11,76 | 5,96 | 0,00 | 1,18 | 56 | 0,55 | 14,91 | 12,196 | Riva_2023 | teacher | social problems | middle childhood | 0,174 | 0,607 | -0,353 | 0,126 |
| 2,15 | 2,21 | 3,12 | 0,80 | 1,86 | 67 | 0,52 | 12,06 | 1,950 | Shanini_2014 | parent | social problems | teens | 0,079 | 0,197 | 0,053 | 0,616 |
| 4,93 | 2,92 | 3,22 | 0,19 | 7,61 | 2134 | 0,26 | 6,22 | 2,551 | Cerniglia_2023 | self | social problems | teens | **0,001** | **0,672** | **0,438** | **0,001** |
| 2,39 | 2,34 | 3,08 | 0,62 | 15,97 | 2245 | 0,49 | 12,49 | 2,023 | Cerniglia_2021 | parent | somatic complaints | early childhood | 0,666 | -0,099 | 0,023 | 0,921 |
| 3,56 | 3,64 | 4,50 | 0,24 | 9,58 | 468 | 0,51 | 12,49 | -3,160 | Uljas_1999 | parent | somatic complaints | early childhood | 0,666 | -0,099 | 0,023 | 0,921 |
| -2,00 | -1,31 | 1,41 | 0,97 | 4,14 | 895 | 0,30 | 6,29 | -1,167 | Gori_2021 | parent | somatic complaints | middle childhood | 0,176 | 0,097 | **0,168** | **0,034** |
| 9,40 | 5,36 | 4,13 | 0,03 | 1,94 | 423 | 0,24 | 5,95 | 4,495 | Cerniglia_2023 | self | somatic complaints | teens | 0,052 | 0,25 | 0,041 | 0,438 |
| -0,85 | -1,14 | 1,42 | 3,42 | 6,00 | 136 | 0,64 | 19,68 | -0,946 | Ajdukovic_2018 | self | thought problems | middle childhood | 0,215 | 0,209 | 0,342 | 0,246 |
| 2,28 | 2,33 | 3,31 | 0,70 | 0,73 | 119 | 0,51 | 11,91 | 2,064 | Shanini_2014 | parent | thought problems | teens | 0,075 | 0,128 | 0,034 | 0,607 |
| 2,41 | 1,32 | 1,29 | 0,72 | 45,42 | 5587 | 0,23 | 6,20 | 1,125 | Lisi_2020 | self | thought problems | teens | **0,002** | **0,946** | **0,924** | **0,002** |
| -2,59 | -1,22 | 1,05 | 0,62 | 43,30 | 6230 | 0,18 | 6,26 | -0,986 | Zubeidat_2018 | self | thought problems | teens | **0,002** | **0,946** | **0,924** | **0,002** |
| -2,68 | -5,26 | 14,48 | 0,59 | 0,03 | 3 | 0,85 | 12,33 | 5,323 | Verhulst_1986 | teacher | total problems | early childhood | 0,844 | 0,005 | -0,082 | 0,135 |
| 2,57 | 1,11 | 0,96 | 0,74 | 2,78 | 2046 | 0,15 | 4,36 | -0,938 | Fombonne_1992 | parent | total problems | middle childhood | 0,599 | -0,024 | 0,014 | 0,755 |
| 1,54 | 1,67 | 2,52 | 1,78 | 9,94 | 6249 | 0,54 | 6,67 | 1,563 | Lisi_2020 | self | total problems | teens | 0,28 | 0,158 | -0,05 | 0,796 |
| 1,41 | 2,09 | 3,52 | 2,06 | 10,14 | 247 | 0,69 | 16,54 | 1,824 | Cerniglia_2021 | parent | withdrawn-depressed | early childhood | 0,101 | 0,421 | 0,412 | 0,379 |
| 2,02 | 1,77 | 1,78 | 0,56 | 7,18 | 529 | 0,44 | 16,58 | -1,394 | Sourander_2001 | parent | withdrawn-depressed | early childhood | 0,101 | 0,421 | 0,412 | 0,379 |
| -2,63 | -2,40 | 2,62 | 0,39 | 2,20 | 46 | 0,45 | 14,39 | 1,958 | Steinhausen_2009 | self | withdrawn-depressed | middle childhood | 0,735 | 0,038 | -0,102 | 0,317 |
| 2,33 | 1,72 | 1,88 | 0,47 | 2,94 | 103 | 0,36 | 10,06 | 1,545 | Riva_2023 | teacher | withdrawn-depressed | middle childhood | 0,802 | -0,032 | -0,174 | 0,166 |
| 3,96 | 2,29 | 2,56 | 0,32 | 22,22 | 3094 | 0,25 | 6,21 | 1,988 | Lisi_2020 | self | withdrawn-depressed | teens | 0,071 | 0,452 | 0,13 | 0,483 |
| North & South America | | | | | | | | | | | | | | | | |
| -1,87 | -1,33 | 1,39 | 0,94 | 6,74 | 504 | 0,34 | 8,41 | 1,160 | Achenbach_1983 | parent | deviant behavior | middle childhood | 0,421 | -0,066 | -0,147 | 0,108 |
| 2,54 | 1,76 | 1,10 | 0,19 | 4,57 | 16,15 | 0,32 | 20,10 | 1,064 | Pettit_1999 | teacher | externalizing | middle childhood | 0,639 | 0,27 | -0,06 | 0,875 |
| Asia | | | | | | | | | | | | | | | | |
| 2,00 | 1,83 | 1,71 | 0,46 | 18,56 | 203 | 0,46 | 19,7 | 1,383 | Tehrani-Doost_2011 | teacher | aggression | middle childhood | 0,572 | 0,252 | -0,139 | 0,725 |
| 3,89 | 1,23 | 0,73 | 0,25 | 28,73 | 2127 | 0,09 | 6,6 | -0,637 | Ahmad_2007 | parent | anxious-depressed | middle childhood | 0,484 | -0,164 | -0,064 | 0,693 |
| 0,87 | 1,56 | 2,62 | 4,91 | 18,08 | 237 | 0,76 | 20,0 | 1,336 | Tehrani-Doost_2011 | teacher | externalizing | middle childhood | 0,798 | 0,09 | 1,287 | 0,592 |
| 1,63 | 1,98 | 2,56 | 1,05 | 10,67 | 84 | 0,60 | 19,9 | -1,613 | Weine_1995_China | teacher | externalizing | middle childhood | 0,798 | 0,09 | 1,287 | 0,592 |
| 1,76 | 3,16 | 6,61 | 1,83 | 4,76 | 135 | 0,76 | 16,5 | -2,800 | Erol_2005 | parent | internalizing | early childhood | 0,088 | -0,455 | 0,007 | 0,984 |
| -5,11 | -2,67 | 0,73 | 0,02 | 2,29 | 13 | 0,22 | 20,2 | 0,650 | Liu_2001 | teacher | internalizing | middle childhood | 0,8 | 0,106 | 0,023 | 0,872 |
| -1,88 | -3,30 | 6,16 | 1,24 | 0,30 | 7 | 0,76 | 19,5 | 2,865 | Erol_2005 | parent | somatic complaints | early childhood | 0,637 | -0,035 | -0,187 | 0,734 |
| -1,45 | -1,81 | 2,40 | 1,39 | 0,44 | 10 | 0,61 | 20,2 | -1,465 | Luan_2022 | parent | somatic complaints | early childhood | 0,637 | -0,035 | -0,187 | 0,734 |
| 5,66 | 1,95 | 0,99 | 0,08 | 5,70 | 553 | 0,11 | 7,7 | -1,006 | Hellinckx_2000 | parent | somatic complaints | middle childhood | 0,232 | -0,184 | -0,11 | 0,176 |
| 2,57 | 2,32 | 1,97 | 0,21 | 1,75 | 66 | 0,45 | 19,3 | 1,781 | Grigorenko_2010 | teacher | somatic complaints | middle childhood | 0,201 | 0,247 | 0,089 | 0,494 |
| -1,22 | -1,46 | 1,86 | 1,83 | 0,66 | 10 | 0,59 | 19,2 | -1,209 | Luan_2022 | parent | withdrawn-depressed | early childhood | **0,04** | **-0,272** | -0,184 | 0,214 |
| 2,41 | 1,40 | 1,38 | 0,64 | 2,65 | 777 | 0,25 | 7,4 | -1,185 | Weine_1995_China | parent | deviant behavior | middle childhood | **0,045** | **-0,138** | -0,078 | 0,199 |
| 3,30 | 3,89 | 3,78 | 0,13 | 3,25 | 26 | 0,59 | 19,7 | -3,229 | Weine_1995_China | teacher | deviant behavior | middle childhood | 0,621 | -0,139 | 0,26 | 0,266 |
| 1,49 | 1,38 | 1,35 | 0,94 | 14,10 | 248 | 0,46 | 19,9 | 1,036 | Tehrani-Doost_2011 | teacher | social problems | middle childhood | 0,996 | 0,002 | 0,102 | 0,799 |
| 1,61 | 1,93 | 2,45 | 1,05 | 12,76 | 87 | 0,59 | 20,0 | -1,568 | Weine_1995_China | teacher | social problems | middle childhood | 0,996 | 0,002 | 0,102 | 0,799 |

**Table S7**

*Sensitivity Analysis Without Influential Studies (Three Age Groups – Boys & Girls)*

|  |  |  |  |  |  |  |  |  |  |  |  |  | With all studies | | Without influential study | |
| --- | --- | --- | --- | --- | --- | --- | --- | --- | --- | --- | --- | --- | --- | --- | --- | --- |
| rstudent | dffits | cook.d | cov.r | tau2.del | QE.del | hat | weight | dfbetayear | influential study | informant | problem | age category | *p* | *b* coeff. | *b* coeff. | *p* |
| *Boys* |  |  |  |  |  |  |  |  |  |  |  |  |  |  |  |  |
| 3,67 | 2,46 | 1,49 | 0,08 | 10,74 | 106,0 | 0,309 | 16,6 | 1,672 | An_2022 | parent | aggression | early childhood | 0,327 | 0,858 | 0,227 | 0,621 |
| 5,29 | 4,06 | 3,18 | 0,03 | 2,24 | 12,9 | 0,416 | 13,4 | 3,850 | Tehrani-Doost_2011 | teacher | aggression | middle childhood | 0,715 | 0,112 | -0,312 | 0,067 |
| -2,65 | -1,62 | 1,46 | 0,44 | 7,58 | 79,0 | 0,276 | 10,1 | -1,285 | Jozefiak_2012 | parent | aggression | teens | 0,536 | 0,164 | 0,407 | 0,096 |
| 4,75 | 4,71 | 7,02 | 0,20 | 28,95 | 1440,7 | 0,495 | 8,4 | 4,289 | Cerniglia_2023 | self | aggression | teens | 0,881 | 0,058 | -0,144 | 0,752 |
| -4,46 | -3,32 | 3,81 | 0,19 | 31,58 | 1711,4 | 0,356 | 8,3 | -2,902 | Zubeidat_2018 | self | aggression | teens | 0,881 | 0,058 | -0,144 | 0,752 |
| 2,19 | 2,28 | 2,30 | 0,41 | 49,75 | 340,2 | 0,521 | 19,9 | 1,795 | An_2022 | parent | anxious-depressed | early childhood | 0,442 | 1,275 | 1,508 | 0,227 |
| 2,01 | 2,57 | 3,27 | 0,65 | 56,06 | 178,9 | 0,620 | 20,0 | -2,110 | Liu_2011 | parent | anxious-depressed | early childhood | 0,442 | 1,275 | 1,508 | 0,227 |
| 4,17 | 2,85 | 2,26 | 0,10 | 3,99 | 63,3 | 0,323 | 12,2 | 2,306 | Tehrani-Doost_2011 | teacher | anxious-depressed | middle childhood | 0,963 | 0,01 | -0,235 | 0,107 |
| -2,62 | -1,61 | 1,49 | 0,45 | 2,60 | 61,9 | 0,277 | 10,1 | -1,283 | Jozefiak_2012 | parent | anxious-depressed | teens | 0,246 | 0,186 | **0,33** | **0,034** |
| -0,68 | -0,66 | 0,45 | 2,14 | 30,55 | 1205,5 | 0,483 | 7,8 | -0,601 | Cerniglia_2023 | self | anxious-depressed | teens | 0,247 | 0,264 | 0,397 | 0,209 |
| 2,95 | 1,99 | 1,36 | 0,17 | 22,70 | 149,4 | 0,310 | 16,7 | 1,341 | An_2022 | parent | attention problems | early childhood | 0,923 | -0,095 | -0,826 | 0,261 |
| -0,87 | -0,58 | 0,34 | 1,47 | 16,28 | 1374,1 | 0,306 | 4,1 | -0,539 | Wright_2023 | parent | attention problems | middle childhood | **0,031** | **0,292** | **0,361** | **0,025** |
| -0,57 | -0,56 | 0,33 | 2,22 | 59,43 | 6937,9 | 0,490 | 7,8 | -0,511 | Cerniglia_2023 | self | attention problems | teens | 0,344 | -0,285 | -0,133 | 0,746 |
| 2,74 | 3,24 | 6,67 | 0,95 | 44,65 | 782,9 | 0,585 | 7,6 | -3,035 | Hensley_1988 | parent | externalizing | early childhood | 0,428 | 0,226 | **0,888** | **0,021** |
| -3,04 | -1,87 | 0,96 | 0,08 | 0,79 | 5,2 | 0,319 | 19,5 | 1,369 | Bilenberg_1999 | self | externalizing | middle childhood | 0,238 | -0,266 | -0,39 | 0,057 |
| 2,87 | 1,67 | 1,40 | 0,31 | 5,57 | 41,4 | 0,254 | 10,7 | 1,258 | Tehrani-Doost_2011 | teacher | externalizing | middle childhood | 0,298 | -0,189 | -0,338 | 0,039 |
| 4,38 | 3,91 | 5,78 | 0,21 | 1,98 | 79,4 | 0,458 | 7,9 | -3,675 | Hensley_1988 | parent | externalizing | teens | **0,049** | **-0,267** | -0,007 | 0,937 |
| 0,16 | 0,26 | 0,08 | 4,51 | 13,15 | 494,9 | 0,728 | 8,5 | 0,247 | Cerniglia_2023 | self | externalizing | teens | 0,405 | -0,142 | -0,184 | 0,573 |
| 4,91 | 6,52 | 11,61 | 0,18 | 9,01 | 237,8 | 0,650 | 9,7 | -6,129 | Hensley_1988 | parent | internalizing | early childhood | 0,286 | -0,264 | 0,462 | 0,042 |
| 2,37 | 0,93 | 0,74 | 0,84 | 13,05 | 2311,9 | 0,132 | 3,4 | -0,803 | Hensley_1988 | parent | internalizing | middle childhood | **0,036** | **-0,221** | -0,09 | 0,224 |
| 1,03 | 2,11 | 4,34 | 4,95 | 8,31 | 16,5 | 0,807 | 20,4 | 1,821 | Henriksen_2012 | self | internalizing | middle childhood | 0,438 | -0,219 | -0,662 | 0,312 |
| 5,38 | 3,10 | 2,01 | 0,05 | 1,58 | 44,9 | 0,257 | 10,9 | 2,466 | Tehrani-Doost_2011 | teacher | internalizing | middle childhood | 0,406 | -0,125 | **-0,278** | **0,006** |
| -2,32 | -1,31 | 1,18 | 0,64 | 5,84 | 264,6 | 0,245 | 8,4 | 1,056 | Bongers 2003 | parent | internalizing | teens | **0,044** | **-0,315** | -0,17 | 0,314 |
| 3,25 | 2,97 | 4,66 | 0,47 | 4,26 | 253,1 | 0,461 | 8,0 | -2,735 | Hensley_1988 | parent | internalizing | teens | **0,044** | **-0,315** | -0,17 | 0,314 |
| 1,64 | 2,67 | 6,09 | 2,66 | 15,24 | 1206,2 | 0,725 | 8,4 | 2,510 | Cerniglia_2023 | self | internalizing | teens | 0,246 | 0,246 | -0,217 | 0,535 |
| -1,65 | -1,12 | 1,14 | 1,23 | 10,27 | 1140,2 | 0,316 | 4,8 | 1,030 | Achenbach_1983 | parent | deviant behavior | middle childhood | 0,635 | -0,054 | -0,164 | 0,21 |
| 1,54 | 1,35 | 1,42 | 1,08 | 14,19 | 58,7 | 0,435 | 14,4 | 1,099 | Tehrani-Doost_2011 | teacher | deviant behavior | middle childhood | 0,157 | -0,399 | **-0,404** | **0,034** |
| 2,72 | 1,78 | 1,44 | 0,26 | 7,81 | 101,7 | 0,298 | 13,7 | -1,323 | Weine_1995_China | teacher | deviant behavior | middle childhood | 0,157 | -0,399 | **-0,404** | **0,034** |
| -1,48 | -1,45 | 1,82 | 1,49 | 0,82 | 39,9 | 0,492 | 10,9 | 1,289 | Bongers 2003 | parent | deviant behavior | teens | 0,867 | 0,012 | -0,07 | 0,433 |
| 2,67 | 2,30 | 2,41 | 0,35 | 6,60 | 43,3 | 0,431 | 14,0 | 1,896 | Tehrani-Doost_2011 | teacher | social problems | middle childhood | 0,869 | 0,038 | -0,241 | 0,251 |
| 4,28 | 4,19 | 6,58 | 0,26 | 6,91 | 804,2 | 0,492 | 8,2 | 3,854 | Cerniglia_2023 | self | social problems | teens | **0,003** | **0,681** | 0,177 | 0,516 |
| -1,94 | -1,44 | 1,62 | 0,96 | 15,09 | 1466,2 | 0,357 | 8,3 | -1,260 | Zubeidat_2018 | self | social problems | teens | **0,003** | **0,681** | 0,177 | 0,516 |
| -0,45 | -0,30 | 0,09 | 1,56 | 11,97 | 1146,7 | 0,303 | 4,8 | 0,273 | Achenbach_1983 | parent | somatic complaints | middle childhood | 0,762 | 0,033 | 0,006 | 0,932 |
| 7,68 | 1,82 | 0,82 | 0,07 | 2,67 | 349,8 | 0,048 | 4,7 | 0,166 | Hellinckx_2000 | parent | somatic complaints | middle childhood | 0,762 | 0,033 | 0,006 | 0,932 |
| 3,21 | 2,50 | 2,51 | 0,20 | 0,32 | 24,7 | 0,396 | 12,9 | 2,043 | Tehrani-Doost_2011 | teacher | somatic complaints | middle childhood | 0,871 | -0,01 | -0,082 | 0,117 |
| -1,70 | -1,62 | 2,11 | 1,24 | 3,20 | 126,8 | 0,474 | 10,3 | 1,439 | Bongers 2003 | parent | somatic complaints | teens | 0,911 | 0,015 | -0,158 | 0,35 |
| 6,46 | 7,20 | 9,64 | 0,10 | 1,64 | 125,1 | 0,511 | 8,6 | 6,238 | Cerniglia_2023 | self | somatic complaints | teens | **<0.001** | **0,607** | **0,27** | **0,007** |
| 8,57 | 5,79 | 3,25 | 0,00 | 0,02 | 5,7 | 0,422 | 13,6 | 7,090 | Tehrani-Doost_2011 | teacher | thought problems | middle childhood | 0,744 | 0,04 | -0,126 | **0,007** |
| 8,74 | 8,55 | 8,73 | 0,03 | 6,48 | 609,3 | 0,494 | 8,3 | 7,857 | Cerniglia_2023 | self | thought problems | teens | 0,053 | 0,664 | -0,279 | 0,299 |
| -2,54 | -1,89 | 2,31 | 0,65 | 37,01 | 2611,9 | 0,357 | 8,3 | -1,654 | Zubeidat_2018 | self | thought problems | teens | 0,053 | 0,664 | -0,279 | 0,299 |
| 0,49 | 0,28 | 0,08 | 1,40 | 5,65 | 7932,0 | 0,245 | 3,4 | 0,259 | Cui_2021 | parent | total problems | middle childhood | 0,459 | -0,04 | -0,054 | 0,385 |
| -0,50 | -4,13 | 22,90 | 125,33 | 4,78 | 21,9 | 0,985 | 20,1 | -3,682 | Henriksen_2012 | self | total problems | middle childhood | 0,905 | 0,02 | 0,66 | 0,661 |
| 3,02 | 1,74 | 1,52 | 0,32 | 3,09 | 71,8 | 0,251 | 9,8 | 1,361 | Tehrani-Doost_2011 | teacher | total problems | middle childhood | 0,236 | -0,152 | **-0,265** | **0,023** |
| 2,11 | 1,89 | 2,67 | 1,00 | 1,97 | 166,6 | 0,442 | 8,3 | -1,701 | Hensley_1988 | parent | total problems | teens | 0,278 | -0,092 | 0,026 | 0,778 |
| -0,86 | -0,57 | 0,32 | 1,47 | 11,38 | 1104,2 | 0,300 | 4,6 | 0,521 | Achenbach_1983 | parent | withdrawn-depressed | middle childhood | 0,226 | -0,132 | -0,188 | 0,148 |
| 4,16 | 3,33 | 2,86 | 0,08 | 1,43 | 10,7 | 0,421 | 13,9 | 2,787 | Tehrani-Doost_2011 | teacher | withdrawn-depressed | middle childhood | 0,392 | -0,187 | **-0,458** | **0,015** |
| -2,25 | -1,40 | 1,28 | 0,61 | 7,34 | 95,6 | 0,278 | 10,3 | -1,117 | Jozefiak_2012 | parent | withdrawn-depressed | teens | 0,236 | -0,291 | -0,085 | 0,692 |
| 2,71 | 4,97 | 14,44 | 1,51 | 12,04 | 338,8 | 0,769 | 9,2 | 4,660 | Cerniglia_2023 | self | withdrawn-depressed | teens | 0,08 | 0,431 | 0,07 | 0,853 |
| 2,93 | 1,62 | 1,41 | 0,39 | 11,35 | 376,5 | 0,230 | 9,2 | -1,246 | Heyerdahl_2003 | self | withdrawn-depressed | teens | 0,08 | 0,431 | 0,07 | 0,853 |
| *Girls* | | | | | | | | | | | | | | | | |
| 3,92 | 2,63 | 1,53 | 0,07 | 7,1 | 51,4 | 0,309 | 16,53 | 1,798 | An_2022 | parent | aggression | early childhood | 0,258 | 0,904 | 0,765 | 0,205 |
| -1,98 | -1,65 | 1,57 | 0,56 | 20,2 | 138,2 | 0,410 | 16,62 | -1,277 | Rodriguez_2019 | parent | aggression | early childhood | 0,258 | 0,904 | 0,765 | 0,205 |
| 7,17 | 5,44 | 3,37 | 0,01 | 0,9 | 11,6 | 0,426 | 13,86 | 5,084 | Tehrani-Doost_2011 | teacher | aggression | middle childhood | 0,997 | 0,001 | **-0,396** | **0,011** |
| -2,96 | -1,81 | 1,63 | 0,35 | 2,4 | 47,1 | 0,273 | 10,11 | -1,469 | Jozefiak_2012 | parent | aggression | teens | 0,78 | 0,045 | 0,207 | 0,135 |
| 3,26 | 3,12 | 5,18 | 0,55 | 16,8 | 753,4 | 0,478 | 7,71 | 2,855 | Cerniglia_2023 | self | aggression | teens | 0,164 | 0,319 | 0,267 | 0,427 |
| -3,36 | -2,45 | 3,09 | 0,41 | 16,3 | 1055,0 | 0,347 | 7,70 | -2,159 | Zubeidat_2018 | self | aggression | teens | 0,164 | 0,319 | 0,267 | 0,427 |
| 2,08 | 2,17 | 2,24 | 0,47 | 41,1 | 281,3 | 0,521 | 19,92 | 1,708 | An_2022 | parent | anxious-depressed | early childhood | 0,443 | 1,119 | 1,385 | 0,084 |
| 2,18 | 2,79 | 3,44 | 0,52 | 38,3 | 113,5 | 0,620 | 20,02 | -2,291 | Liu_2011 | parent | anxious-depressed | early childhood | 0,443 | 1,119 | 1,385 | 0,084 |
| 2,73 | 1,90 | 1,75 | 0,34 | 10,6 | 134,9 | 0,327 | 12,42 | 1,503 | Tehrani-Doost_2011 | teacher | anxious-depressed | middle childhood | 0,455 | -0,193 | -0,445 | 0,067 |
| -2,54 | -1,55 | 1,42 | 0,48 | 2,4 | 50,6 | 0,274 | 10,06 | -1,237 | Jozefiak_2012 | parent | anxious-depressed | teens | 0,264 | 0,17 | **0,305** | **0,04** |
| -0,07 | -0,06 | 0,00 | 2,21 | 34,6 | 821,4 | 0,462 | 7,23 | -0,058 | Cerniglia_2023 | self | anxious-depressed | teens | 0,548 | -0,132 | -0,119 | 0,692 |
| 3,00 | 2,03 | 1,38 | 0,16 | 22,1 | 194,1 | 0,311 | 16,72 | 1,361 | An_2022 | parent | attention problems | early childhood | 0,954 | -0,057 | -0,788 | 0,275 |
| -0,75 | -0,49 | 0,25 | 1,50 | 13,9 | 1652,7 | 0,305 | 4,17 | -0,459 | Wright_2023 | parent | attention problems | middle childhood | 0,338 | 0,114 | 0,168 | 0,237 |
| -1,67 | -1,59 | 2,20 | 1,44 | 91,6 | 8020,7 | 0,474 | 7,16 | -1,465 | Cerniglia_2023 | self | attention problems | teens | 0,952 | 0,023 | -0,064 | 0,934 |
| 1,94 | 1,41 | 1,61 | 1,01 | 85,5 | 7245,2 | 0,344 | 7,12 | 1,252 | Zubeidat_2018 | self | attention problems | teens | 0,952 | 0,023 | -0,064 | 0,934 |
| 1,98 | 2,37 | 4,43 | 1,52 | 36,5 | 615,0 | 0,588 | 7,69 | -2,206 | Hensley_1988 | parent | externalizing | early childhood | 0,106 | 0,388 | **0,82** | **0,019** |
| 2,28 | 0,90 | 0,71 | 0,85 | 15,0 | 1542,6 | 0,133 | 3,38 | -0,779 | Hensley_1988 | parent | externalizing | middle childhood | **0,001** | **-0,427** | **-0,278** | **<0.001** |
| -2,53 | -1,80 | 1,21 | 0,20 | 1,6 | 8,9 | 0,313 | 19,87 | 1,098 | Bilenberg_1999 | self | externalizing | middle childhood | 0,216 | -0,308 | -0,441 | 0,078 |
| 4,72 | 2,74 | 1,92 | 0,08 | 1,7 | 40,3 | 0,257 | 10,95 | 1,980 | Tehrani-Doost_2011 | teacher | externalizing | middle childhood | 0,209 | -0,189 | **-0,324** | **0,005** |
| 7,36 | 2,26 | 0,86 | 0,02 | 6,6 | 187,3 | 0,085 | 7,94 | -0,721 | McKelvey_1999 | parent | externalizing | teens | 0,292 | -0,386 | **-0,297** | **0,039** |
| -0,02 | -0,03 | 0,00 | 3,88 | 11,0 | 763,0 | 0,688 | 7,83 | -0,031 | Cerniglia_2023 | self | externalizing | teens | 0,71 | 0,054 | 0,058 | 0,823 |
| 5,08 | 6,64 | 11,69 | 0,16 | 7,6 | 189,9 | 0,648 | 9,64 | -6,295 | Hensley_1988 | parent | internalizing | early childhood | 0,341 | -0,223 | **0,471** | **0,028** |
| -2,47 | -1,67 | 1,07 | 0,20 | 2,4 | 18,9 | 0,314 | 19,68 | 1,076 | Bilenberg_1999 | self | internalizing | middle childhood | 0,235 | -0,319 | -0,461 | 0,084 |
| 3,51 | 2,07 | 1,66 | 0,19 | 3,8 | 103,5 | 0,260 | 11,01 | 1,583 | Tehrani-Doost_2011 | teacher | internalizing | middle childhood | 0,175 | -0,224 | **-0,37** | **0,01** |
| 3,06 | 2,82 | 4,43 | 0,54 | 5,0 | 262,0 | 0,462 | 8,01 | -2,587 | Hensley_1988 | parent | internalizing | teens | **0,042** | **-0,333** | -0,06 | 0,675 |
| 0,47 | 0,69 | 0,52 | 3,69 | 27,4 | 1926,5 | 0,686 | 7,76 | 0,653 | Cerniglia_2023 | self | internalizing | teens | 0,732 | -0,078 | -0,23 | 0,576 |
| -2,24 | -1,52 | 1,90 | 0,99 | 4,3 | 1162,2 | 0,318 | 4,81 | 1,403 | Achenbach_1983 | parent | deviant behavior | middle childhood | 0,733 | -0,026 | -0,123 | 0,149 |
| 3,73 | 3,23 | 2,89 | 0,15 | 1,4 | 24,6 | 0,434 | 14,52 | 2,522 | Tehrani-Doost_2011 | teacher | deviant behavior | middle childhood | 0,121 | -0,253 | **-0,44** | **0,008** |
| -1,52 | -1,53 | 2,01 | 1,49 | 0,6 | 40,0 | 0,498 | 10,87 | 1,361 | Bongers 2003 | parent | deviant behavior | teens | 0,887 | -0,009 | -0,083 | 0,293 |
| -0,13 | -0,12 | 0,02 | 2,31 | 12,8 | 3755,0 | 0,480 | 7,75 | -0,110 | Cerniglia_2023 | self | deviant behavior | teens | 0,252 | -0,156 | -0,141 | 0,451 |
| 3,55 | 3,16 | 3,11 | 0,16 | 4,9 | 28,3 | 0,451 | 16,11 | 2,573 | Tehrani-Doost_2011 | teacher | social problems | middle childhood | 0,732 | -0,073 | -0,36 | 0,057 |
| -1,33 | -1,26 | 1,45 | 1,57 | 5,8 | 144,9 | 0,473 | 10,09 | 1,121 | Bongers 2003 | parent | social problems | teens | 0,585 | -0,097 | -0,279 | 0,23 |
| 3,70 | 3,53 | 5,79 | 0,41 | 21,7 | 1014,8 | 0,478 | 7,68 | 3,233 | Cerniglia_2023 | self | social problems | teens | **0,035** | **0,627** | 0,293 | 0,063 |
| 2,98 | 1,36 | 1,08 | 0,41 | 27,5 | 2584,0 | 0,172 | 7,63 | -1,015 | Lambert_1999 | self | social problems | teens | **0,035** | **0,627** | 0,293 | 0,063 |
| 0,23 | 0,15 | 0,02 | 1,58 | 19,7 | 1492,3 | 0,300 | 4,72 | -0,139 | Achenbach_1983 | parent | somatic complaints | middle childhood | 0,603 | -0,071 | -0,048 | 0,589 |
| 6,84 | 1,59 | 0,74 | 0,09 | 5,2 | 477,6 | 0,048 | 4,75 | 0,133 | Hellinckx_2000 | parent | somatic complaints | middle childhood | 0,603 | -0,071 | -0,048 | 0,589 |
| 2,80 | 2,29 | 2,32 | 0,29 | 0,8 | 32,8 | 0,418 | 13,80 | 1,820 | Tehrani-Doost_2011 | teacher | somatic complaints | middle childhood | 0,606 | -0,046 | -0,145 | 0,09 |
| -1,32 | -1,25 | 1,42 | 1,59 | 7,7 | 207,8 | 0,473 | 10,12 | 1,105 | Bongers 2003 | parent | somatic complaints | teens | 0,794 | -0,052 | -0,258 | 0,323 |
| 8,24 | 8,31 | 8,66 | 0,04 | 1,7 | 66,0 | 0,484 | 7,85 | 7,221 | Cerniglia_2023 | self | somatic complaints | teens | 0,098 | 0,267 | -0,033 | 0,791 |
| -3,36 | -2,43 | 3,08 | 0,40 | 7,6 | 410,5 | 0,341 | 7,62 | -2,157 | Zubeidat_2018 | self | somatic complaints | teens | 0,098 | 0,267 | -0,033 | 0,791 |
| 8,01 | 5,83 | 3,42 | 0,00 | 0,1 | 11,3 | 0,423 | 13,87 | 5,505 | Tehrani-Doost_2011 | teacher | thought problems | middle childhood | 0,614 | -0,048 | **-0,179** | **0,002** |
| 6,11 | 5,78 | 7,83 | 0,10 | 15,3 | 664,3 | 0,476 | 7,66 | 5,312 | Cerniglia_2023 | self | thought problems | teens | 0,136 | 0,503 | -0,673 | 0,057 |
| -1,66 | -1,22 | 1,27 | 1,14 | 58,7 | 2429,6 | 0,348 | 7,71 | -1,073 | Zubeidat_2018 | self | thought problems | teens | 0,136 | 0,503 | -0,673 | 0,057 |
| 2,50 | 1,46 | 1,23 | 0,44 | 11,8 | 286,3 | 0,255 | 11,15 | 1,091 | Bedregal_2023 | parent | total problems | early childhood | 0,613 | 0,083 | -0,047 | 0,731 |
| -3,57 | -0,95 | 0,63 | 0,54 | 4,9 | 2475,0 | 0,066 | 3,39 | 0,661 | Achenbach_1991 | parent | total problems | middle childhood | 0,698 | -0,023 | -0,08 | 0,18 |
| 0,55 | 0,31 | 0,10 | 1,38 | 7,2 | 10061,2 | 0,240 | 3,39 | 0,284 | Cui_2021 | parent | total problems | middle childhood | 0,698 | -0,023 | -0,08 | 0,18 |
| -0,78 | -6,40 | 47,09 | 91,41 | 7,8 | 53,0 | 0,985 | 19,70 | -5,725 | Henriksen_2012 | self | total problems | middle childhood | 0,962 | -0,011 | 1,239 | 0,526 |
| 4,68 | 2,73 | 2,13 | 0,10 | 1,4 | 70,6 | 0,254 | 9,93 | 2,129 | Tehrani-Doost_2011 | teacher | total problems | middle childhood | 0,14 | -0,175 | **-0,295** | **0,002** |
| 1,98 | 1,76 | 2,40 | 1,07 | 4,6 | 401,2 | 0,442 | 8,27 | -1,585 | Hensley_1988 | parent | total problems | teens | 0,565 | -0,071 | 0,095 | 0,496 |
| -2,14 | -1,62 | 1,90 | 0,81 | 7,1 | 1546,6 | 0,366 | 9,00 | 1,413 | Hannesdottir_1995 | self | total problems | teens | 0,992 | -0,002 | -0,27 | 0,268 |
| -1,09 | -0,71 | 0,50 | 1,40 | 12,0 | 1134,1 | 0,299 | 4,54 | 0,655 | Achenbach_1983 | parent | withdrawn-depressed | middle childhood | 0,085 | -0,198 | **-0,27** | **0,047** |
| 2,77 | 2,38 | 2,44 | 0,32 | 5,4 | 26,4 | 0,430 | 14,24 | 1,928 | Tehrani-Doost_2011 | teacher | withdrawn-depressed | middle childhood | 0,17 | -0,342 | **-0,614** | **0,023** |
| 3,02 | 5,00 | 13,73 | 1,14 | 12,3 | 348,5 | 0,731 | 8,42 | 4,701 | Cerniglia_2023 | self | withdrawn-depressed | teens | 0,142 | 0,342 | -0,406 | 0,201 |

**Table S8**

*Sensitivity Analysis with Studies using the 2001 version of the CBCL, TRF, and YSR (From 2001 to 2019)*

| **Informant** | **Problem** | **Age group** | ***k*** | **beta coeff.** | ***p*-value** |
| --- | --- | --- | --- | --- | --- |
| *Three age groups* | | | | | |
| parent | aggression | early childhood | 18 | 0,277 | 0,511 |
| parent | aggression | middle childhood | 18 | -0,197 | 0,19 |
| self | aggression | teens | 18 | 0,277 | 0,511 |
| teacher | aggression | middle childhood | 7 | 0,587 | 0,298 |
| parent | anxious-depressed | early childhood | 6 | -0,962 | 0,303 |
| parent | anxious-depressed | middle childhood | 15 | 0,287 | 0,5 |
| self | anxious-depressed | teens | 18 | -0,184 | 0,321 |
| teacher | anxious-depressed | middle childhood | 10 | 0,132 | 0,672 |
| parent | attention problems | early childhood | 15 | -0,195 | 0,648 |
| parent | attention problems | middle childhood | 17 | 0,002 | 0,989 |
| self | attention problems | teens | 8 | 0,282 | 0,45 |
| teacher | attention problems | middle childhood | 6 | 1,542 | 0,256 |
| parent | deviant behavior | middle childhood | 13 | -0,035 | 0,592 |
| self | deviant behavior | teens | 7 | 0,179 | 0,355 |
| teacher | deviant behavior | middle childhood | 6 | -0,04 | 0,884 |
| parent | externalizing | early childhood | 30 | 0,356 | 0,115 |
| parent | externalizing | middle childhood | 24 | 0,012 | 0,901 |
| parent | externalizing | teens | 6 | -0,119 | 0,421 |
| self | externalizing | middle childhood | 7 | 0,171 | 0,512 |
| self | externalizing | teens | 9 | 0,681 | 0,073 |
| teacher | externalizing | middle childhood | 6 | -0,394 | 0,652 |
| parent | internalizing | early childhood | 27 | 0,126 | 0,42 |
| parent | internalizing | middle childhood | 25 | 0,001 | 0,991 |
| parent | internalizing | teens | 6 | 0,194 | 0,057 |
| self | internalizing | middle childhood | 6 | -0,062 | 0,785 |
| self | internalizing | teens | **9** | **0,622** | **0,043** |
| teacher | internalizing | middle childhood | 6 | -0,292 | 0,704 |
| parent | social problems | middle childhood | 16 | 0,004 | 0,979 |
| self | social problems | teens | **7** | **0,851** | **0,038** |
| teacher | social problems | middle childhood | 5 | 1,669 | 0,109 |
| parent | somatic complaints | early childhood | 12 | 0,139 | 0,536 |
| parent | somatic complaints | middle childhood | 16 | 0,053 | 0,634 |
| self | somatic complaints | teens | 8 | 0,526 | 0,096 |
| teacher | somatic complaints | middle childhood | 6 | -0,113 | 0,408 |
| parent | thought problems | middle childhood | 13 | 0,109 | 0,193 |
| self | thought problems | teens | 7 | 1,133 | 0,116 |
| teacher | thought problems | middle childhood | 5 | -0,168 | 0,555 |
| parent | total problems | early childhood | 15 | 0,13 | 0,59 |
| parent | total problems | middle childhood | 17 | 0,16 | 0,299 |
| self | total problems | teens | **6** | **0,706** | **0,045** |
| teacher | total problems | early childhood | 5 | -0,19 | 0,359 |
| teacher | total problems | middle childhood | 5 | -0,183 | 0,817 |
| parent | withdrawn-depressed | early childhood | 12 | 0,425 | 0,246 |
| parent | withdrawn-depressed | middle childhood | 15 | -0,006 | 0,976 |
| self | withdrawn-depressed | middle childhood | 5 | -0,117 | 0,505 |
| self | withdrawn-depressed | teens | **7** | **1,306** | **0,019** |
| teacher | withdrawn-depressed | middle childhood | 6 | 0,36 | 0,397 |
| *Continent: Europe* | | | | | |
| parent | aggression | early childhood | 9 | 0,452 | 0,302 |
| parent | aggression | middle childhood | 6 | -0,401 | 0,071 |
| self | aggression | teens | 6 | 0,452 | 0,563 |
| parent | anxious-depressed | early childhood | 6 | 0,258 | 0,573 |
| parent | anxious-depressed | middle childhood | 6 | -0,037 | 0,935 |
| self | anxious-depressed | teens | 8 | 0,281 | 0,432 |
| teacher | anxious-depressed | middle childhood | 5 | 0,114 | 0,411 |
| parent | attention problems | early childhood | 6 | -0,159 | 0,703 |
| parent | attention problems | middle childhood | 7 | -0,117 | 0,723 |
| self | attention problems | teens | 7 | 0,159 | 0,737 |
| self | deviant behavior | teens | 6 | 0,2 | 0,473 |
| teacher | deviant behavior | middle childhood | 5 | 0,087 | 0,274 |
| parent | externalizing | early childhood | 16 | 0,336 | 0,244 |
| parent | externalizing | middle childhood | 11 | -0,121 | 0,304 |
| parent | externalizing | teens | 5 | 0,01 | 0,956 |
| self | externalizing | middle childhood | 6 | 0,263 | 0,569 |
| self | externalizing | teens | 7 | 0,506 | 0,195 |
| parent | internalizing | early childhood | 14 | 0,218 | 0,351 |
| parent | internalizing | middle childhood | 11 | -0,064 | 0,667 |
| parent | internalizing | teens | **5** | **0,277** | **0,05** |
| self | internalizing | middle childhood | 5 | 0,065 | 0,873 |
| self | internalizing | teens | **7** | **0,573** | **0,036** |
| parent | social problems | middle childhood | 5 | 0,247 | 0,332 |
| self | social problems | teens | **6** | **1,124** | **0,041** |
| parent | somatic complaints | early childhood | **5** | **0,596** | **0,007** |
| parent | somatic complaints | middle childhood | 5 | 0,202 | 0,597 |
| self | somatic complaints | teens | 7 | 0,7 | 0,107 |
| teacher | somatic complaints | middle childhood | 5 | -0,082 | 0,088 |
| self | thought problems | teens | 6 | 1,527 | 0,128 |
| parent | total problems | early childhood | 7 | 0,037 | 0,871 |
| parent | total problems | middle childhood | 6 | 0,097 | 0,62 |
| parent | withdrawn-depressed | middle childhood | 5 | 0,353 | 0,601 |
| self | withdrawn-depressed | teens | **6** | **1,618** | **0,03** |
| teacher | withdrawn-depressed | middle childhood | 5 | 0,498 | 0,026 |
| *North & South America* | | | | | |
| parent | aggression | middle childhood | 9 | -0,078 | 0,743 |
| parent | anxious-depressed | middle childhood | 8 | -0,173 | 0,397 |
| parent | attention problems | middle childhood | 7 | 0,035 | 0,906 |
| parent | deviant behavior | middle childhood | 7 | -0,048 | 0,574 |
| parent | externalizing | early childhood | 7 | 0,39 | 0,281 |
| parent | externalizing | middle childhood | 10 | 0,179 | 0,335 |
| parent | internalizing | early childhood | 7 | 0,114 | 0,603 |
| parent | internalizing | middle childhood | 10 | 0,246 | 0,21 |
| parent | social problems | middle childhood | 8 | -0,081 | 0,766 |
| parent | somatic complaints | middle childhood | 8 | 0,132 | 0,317 |
| parent | thought problems | middle childhood | 6 | 0,039 | 0,666 |
| parent | total problems | early childhood | 6 | 0,373 | 0,303 |
| parent | total problems | middle childhood | 8 | 0,253 | 0,308 |
| parent | withdrawn-depressed | middle childhood | 7 | -0,012 | 0,958 |
